# Supplementary material for: Identifying epigenetic aging moderators using the epigenetic pacemaker
Source: Front Bioinform. 2024 Jan 3;3:1308680. doi: 10.3389/fbinf.2023.1308680 (PMC10791860; doi:10.3389/fbinf.2023.1308680)
Supplement: Supplementary file 4 [file Table1.XLSX]

## Sheet: Sheet1
Trait From	Beta	Gamma	Gamma Std. Dev.	Sample Effect	Age Only	Generated Phenotypes
Continuous	0.1		0.05	Yes	No	10
Continuous	0.1		0.05	Yes	No	10
Continuous	0.1		0.05	No	Yes	20
Continuous	0.1		0.05	No	Yes	20
Binary	0.1	0.5	0	Yes	No	1
